# Supplementary material for: A global daily mesoscale front dataset from satellite observations: in situ validation and cross-dataset comparison
Source: Copernicus journal article supplement (doi:10.5194/essd-17-2831-2025), 2025-06-24
Supplement: Supplementary file 1 [file essd-17-2831-2025-supplement.pdf]

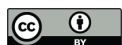

## *Supplement of*

# **A global daily mesoscale front dataset from satellite observations: in situ validation and cross-dataset comparison**

**Qinwang Xing et al.**

*Correspondence to:* Haiqing Yu ([yuhaiqing@sdu.edu.cn](mailto:yuhaiqing@sdu.edu.cn)), Wei Yu ([wyu@shou.edu.cn](mailto:wyu@shou.edu.cn)), and Xinjun Chen ([xjchen@shou.edu.cn](mailto:xjchen@shou.edu.cn))

The copyright of individual parts of the supplement might differ from the article licence.

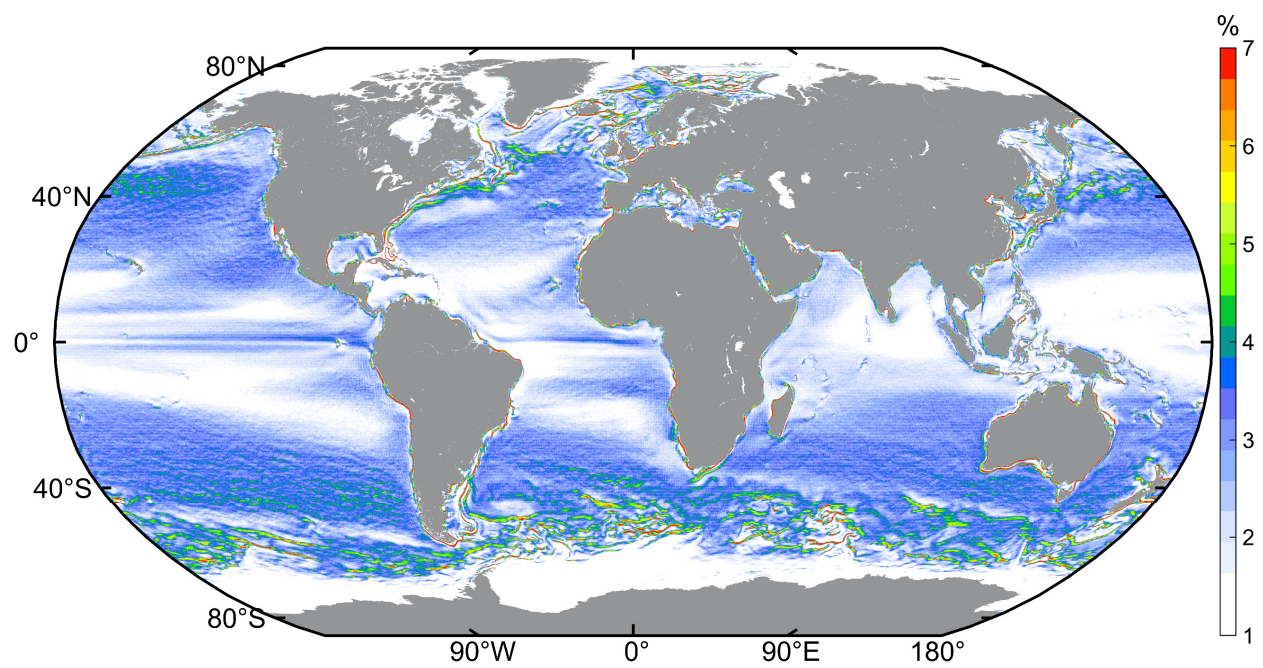

**Figure S1: Long-term frontal occurrence frequency from ESA SST (1982–2023) using the global front detection algorithm without random windows.**

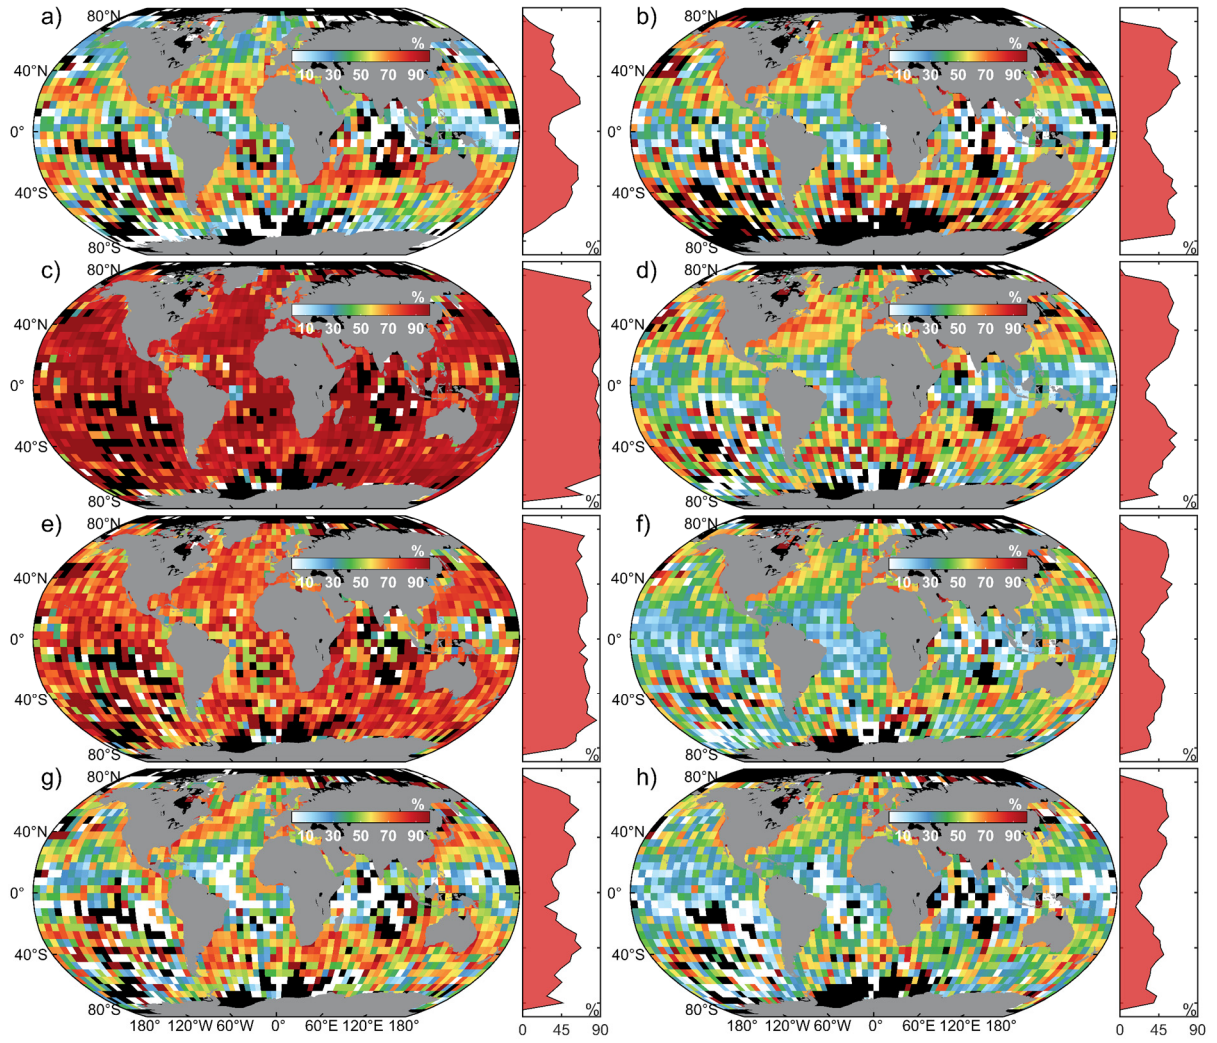

**Figure S2: Statistical indicators of fronts derived from different datasets. a), c), e), and g) represent the hit rate for MODIS, REMSS, GLORYS, and HadGEM3-detected fronts, respectively, while (b), (d), (f), and (h) show their corresponding precision values.**
